# Supplementary material for: Synthesis, characterization and photocatalytic studies of mesoporous silica grafted Ni(ii) and Cu(ii) complexes
Source: Royal Society of Chemistry journal article supplement (doi:10.1039/c5ra07469j), 2015-01-01
Supplement: c5ra07469j1.pdf [file c5ra07469j1.pdf]

### Electronic Supplementary Information (ESI)

## Synthesis, characterization and photocatalytic studies of mesoporous silica grafted Ni(II) and Cu(II) Complexes.

G. RamanjaneyaReddy,<sup>a</sup> and S. Balasubramanian<sup>a\*</sup>

<sup>a</sup>Department of Inorganic Chemistry, School of Chemical Sciences, University of Madras,  
Guindy Campus, Chennai-600 025, India.

E-mail:bala2010@yahoo.com; Tel: +91 9444016707, 044 22202794, Fax: +91 4422300488.

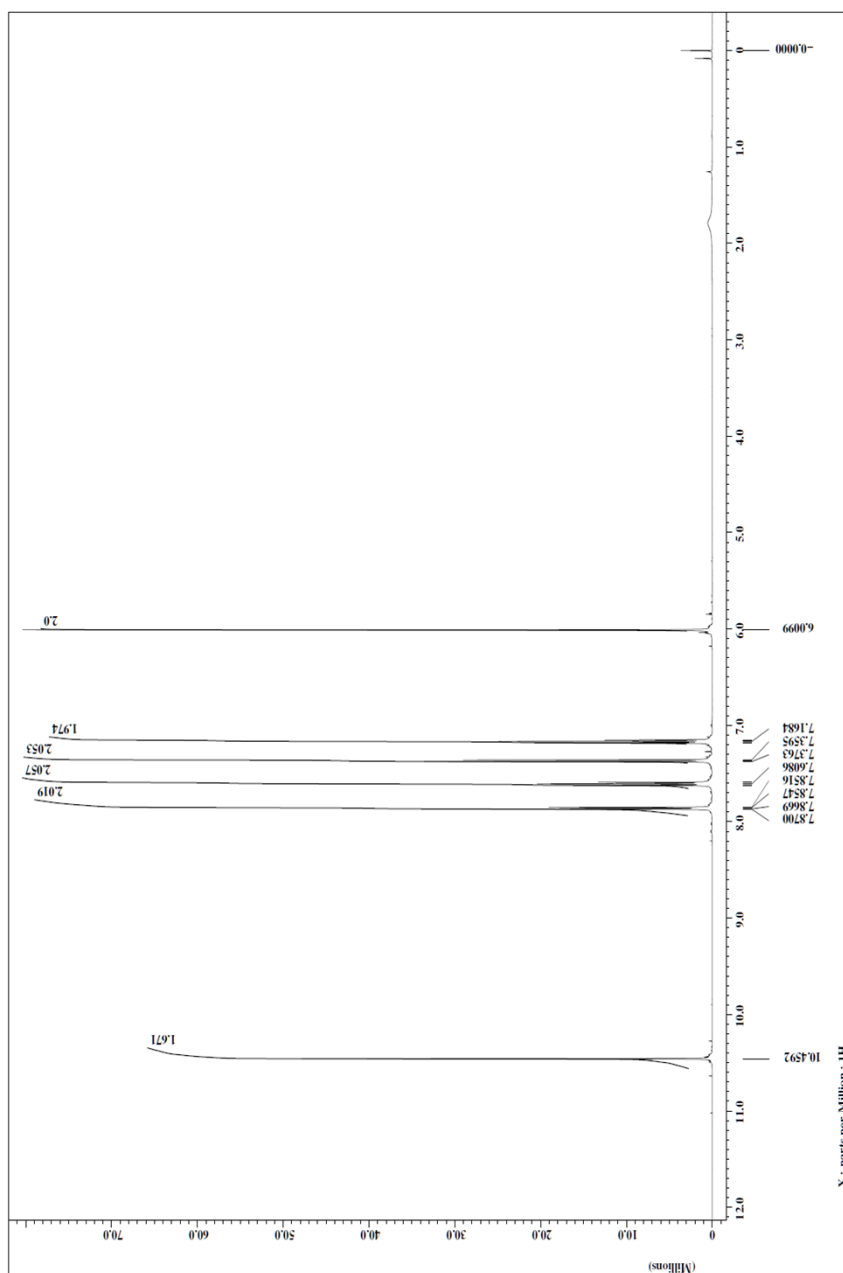

Fig. S1: <sup>1</sup>H-NMR spectrum of SL

Fig.S2:<sup>13</sup>C-NMR spectrum of SL

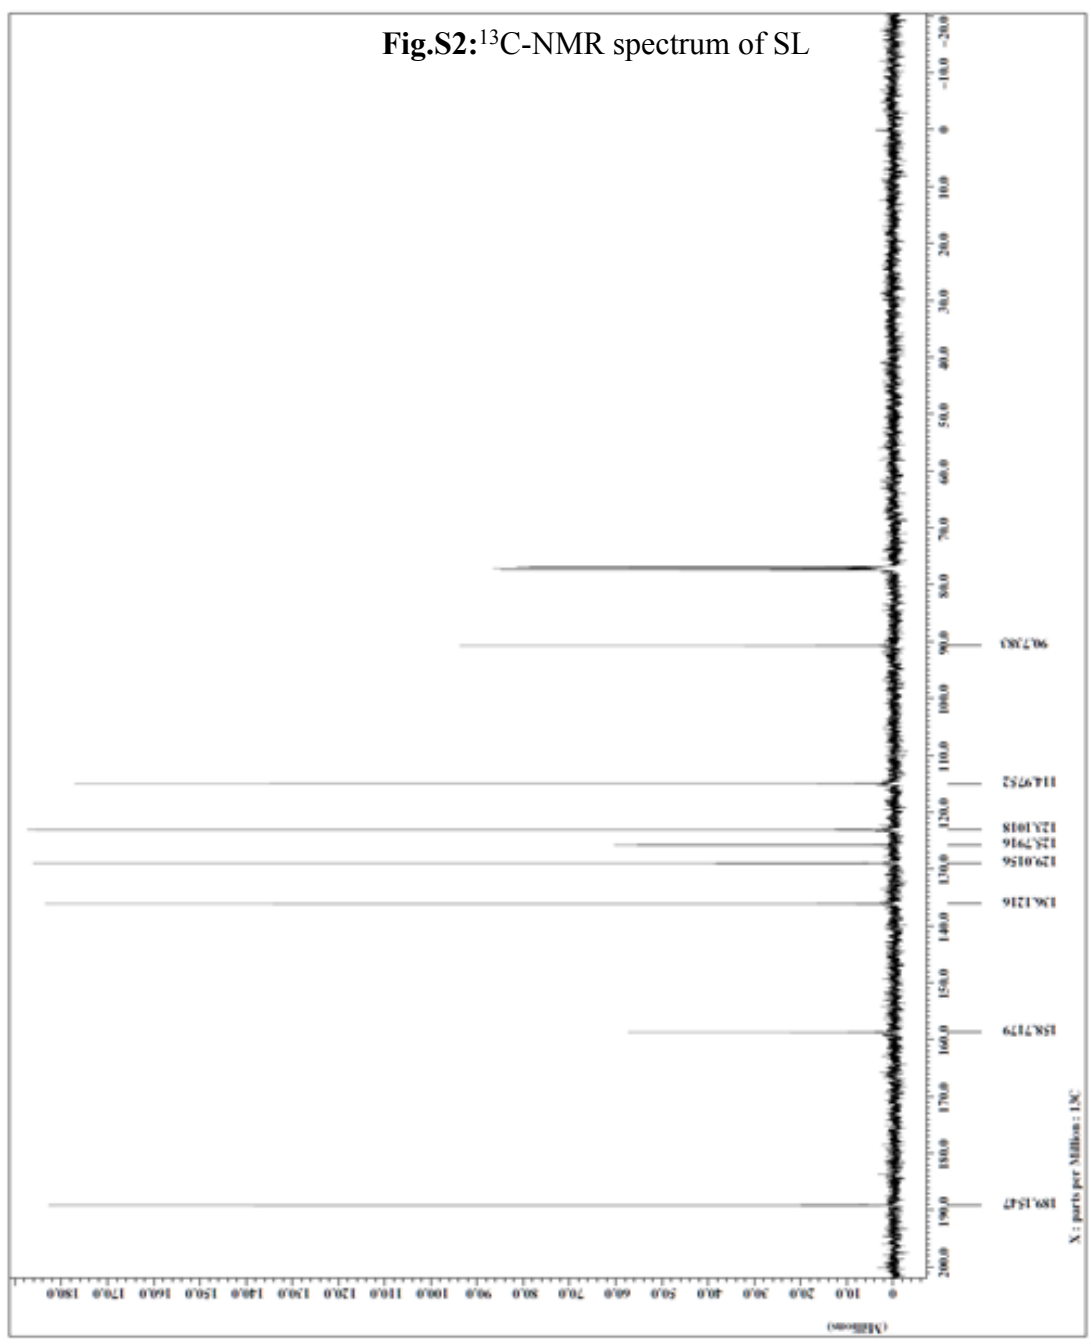

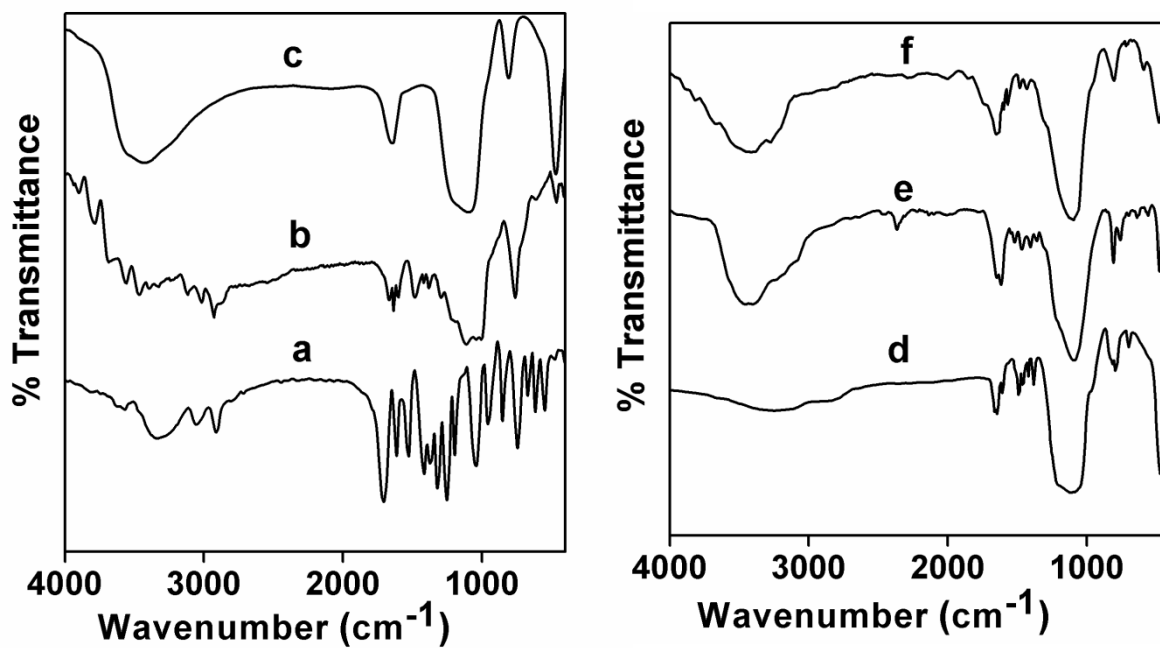

**Fig. S3:** FTIR spectra of the (a) SL, (b) SLTES, (c) MCM41, (d) SiOF, (e) NiOF and (d) CuOF.

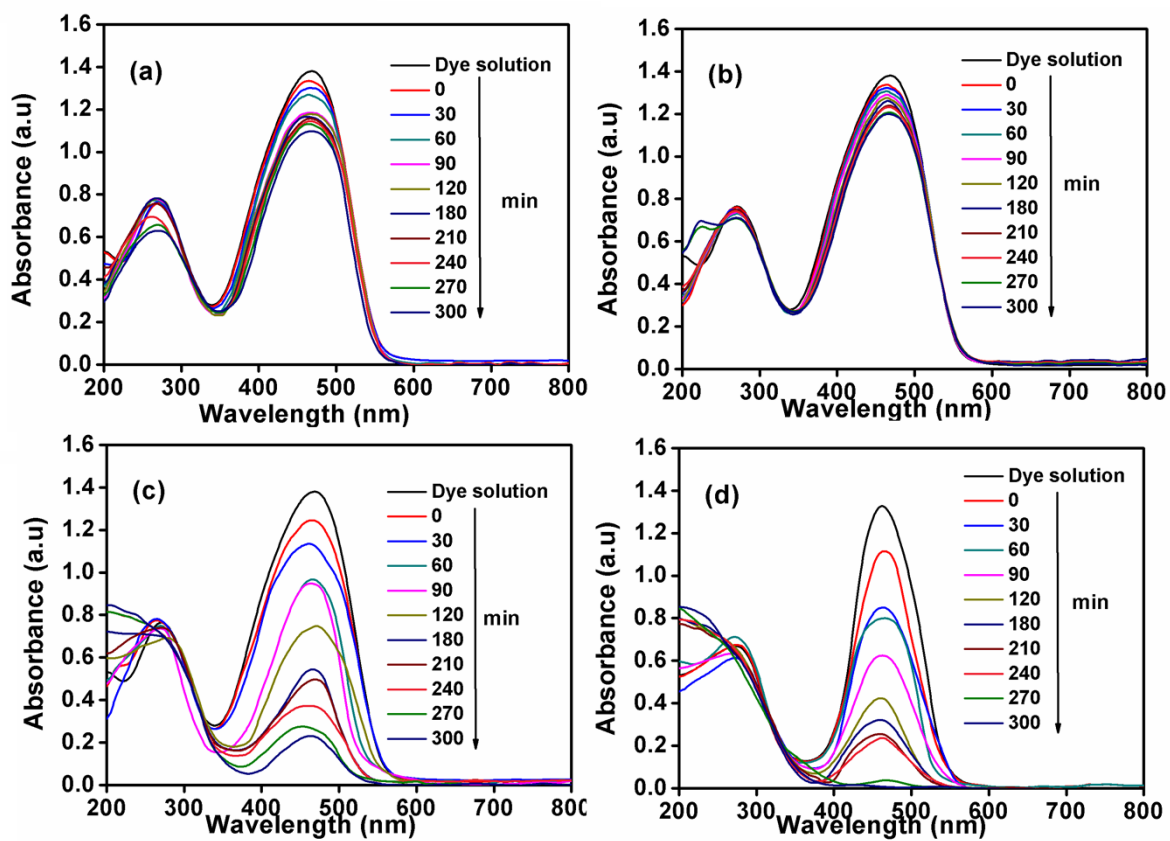

Fig. S4: The absorption plots for the photo degradation of MO in the presence of (a) Si-MCM41, (b) SiOF, (c) NiOF and (d) CuOF.

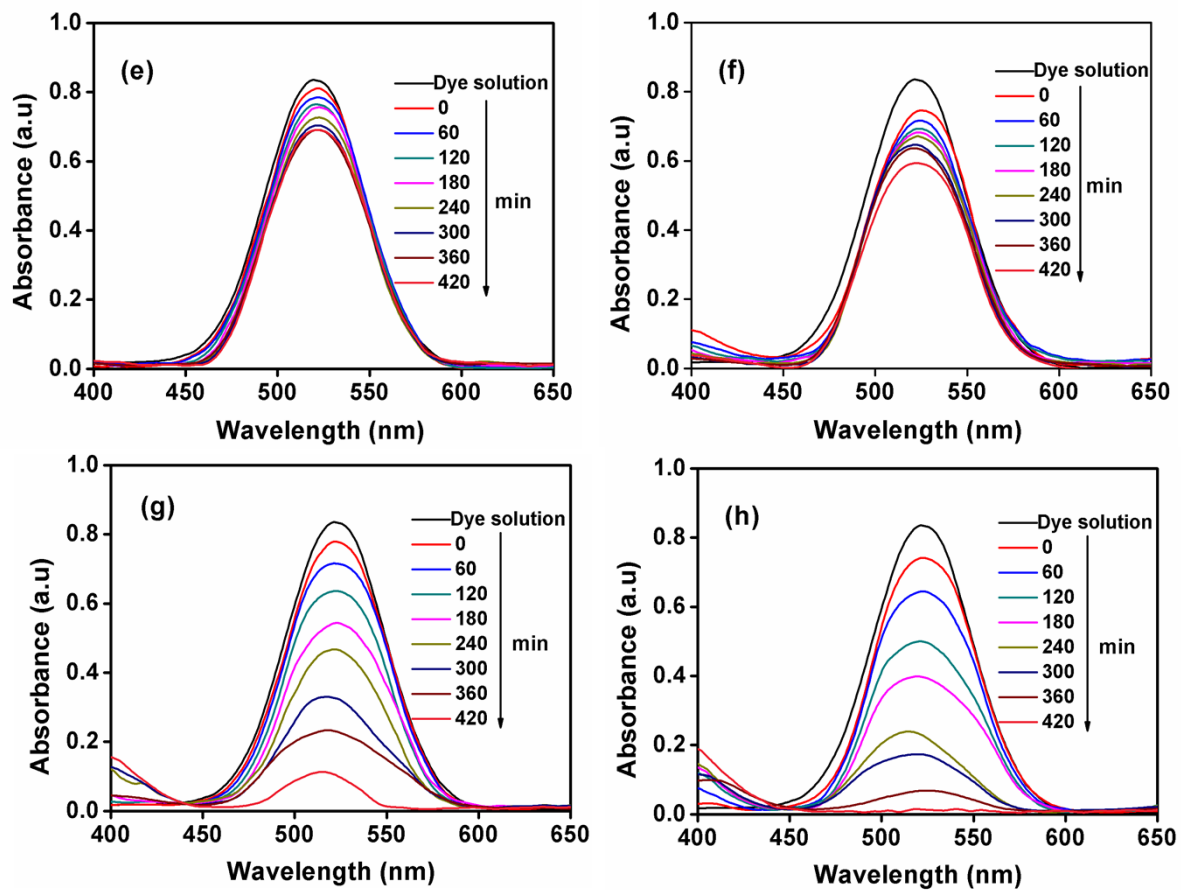

Fig.S5: The absorption plots for the photo degradation of RR in the presence of (e) Si-MCM41, (f) SiOF, (g) NiOF and (h) CuOF

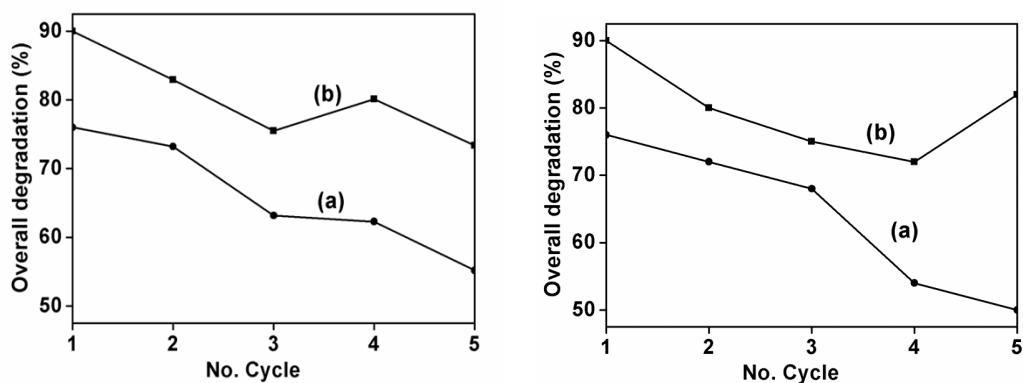

**Fig.S6:** The overall percentage of conversion in the methyl orange (a) reactive red 198 (b) in five cycles.

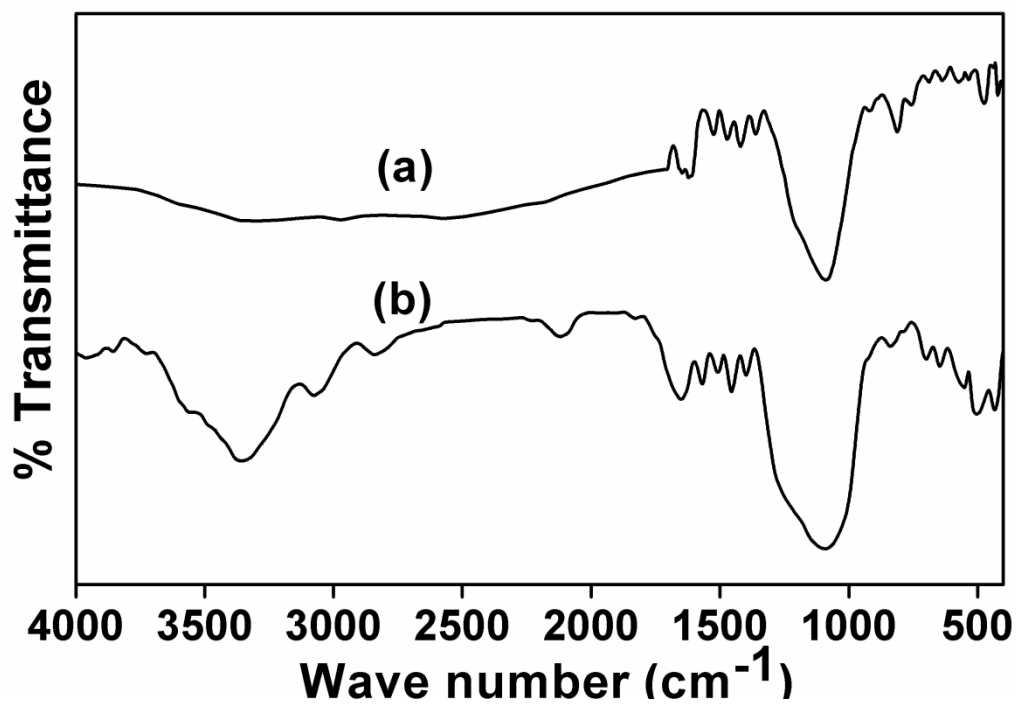

**Fig. S7:** FTIR spectra of the recovered (a) NiOF and (b) CuOF.

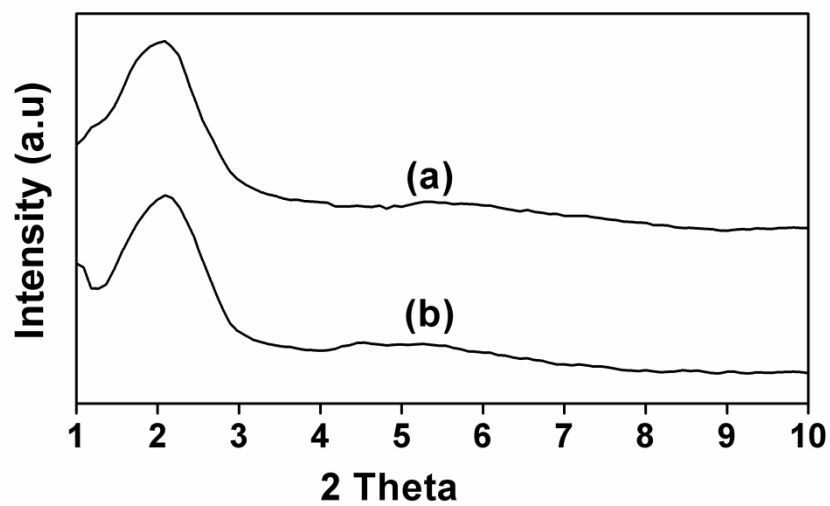

**Fig.S8:** XRD patterns of the recovered (a) NiOF and (b) CuOF.
